# Supplementary material for: The interaction between Staphylococcus aureus SdrD and desmoglein 1 is important for adhesion to host cells
Source: PubMed Central journal article supplement (PMC4770587; doi:10.1038/srep22134), 2016-02-29
Supplement: srep22134-s1.pdf [file srep22134-s1.pdf]

**The interaction between *Staphylococcus aureus* SdrD and desmoglein 1 is important for adhesion to host cells.**

**Fatemeh Askarian<sup>1</sup>, Clement Ajayi<sup>1</sup>, Anne-Merethe Hanssen<sup>1</sup>, Nina M. van Sorge<sup>2</sup>, Ingvild Pettersen<sup>1</sup>, Dzung B. Diep<sup>3</sup>, Johanna U. E. Sollid<sup>1</sup>, Mona Johannessen<sup>1</sup>**

<sup>1</sup>Research group of Host-Microbe Interactions, Department of Medical Biology, Faculty of Health Sciences, UiT-The Arctic University of Norway, Norway.

<sup>2</sup>Medical Microbiology, University Medical Center Utrecht, Utrecht 3584CX, The Netherlands.

<sup>3</sup>Department of Chemistry, Biotechnology and Food Science, Norwegian University of Life Science, Ås, Norway.

e-mail: [mona.johannessen@uit.no](mailto:mona.johannessen@uit.no)

**Supplementary Fig. S1. Growth curves and exoprotein profiles of *S. aureus* NCTC8325-4 and NCTC8325-4 $\Delta$ *sdrD*.**

**a**

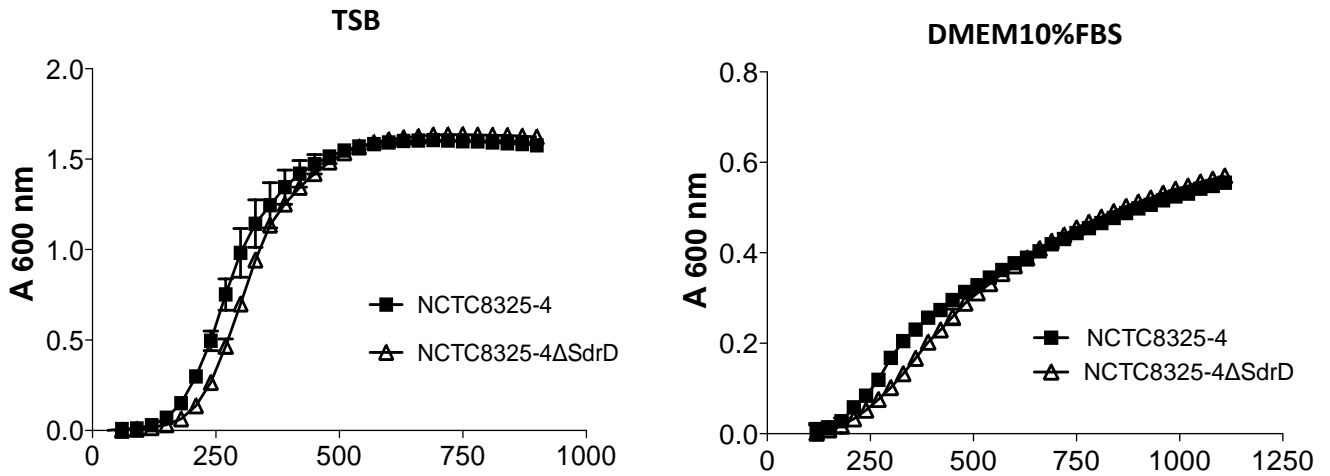

**b**

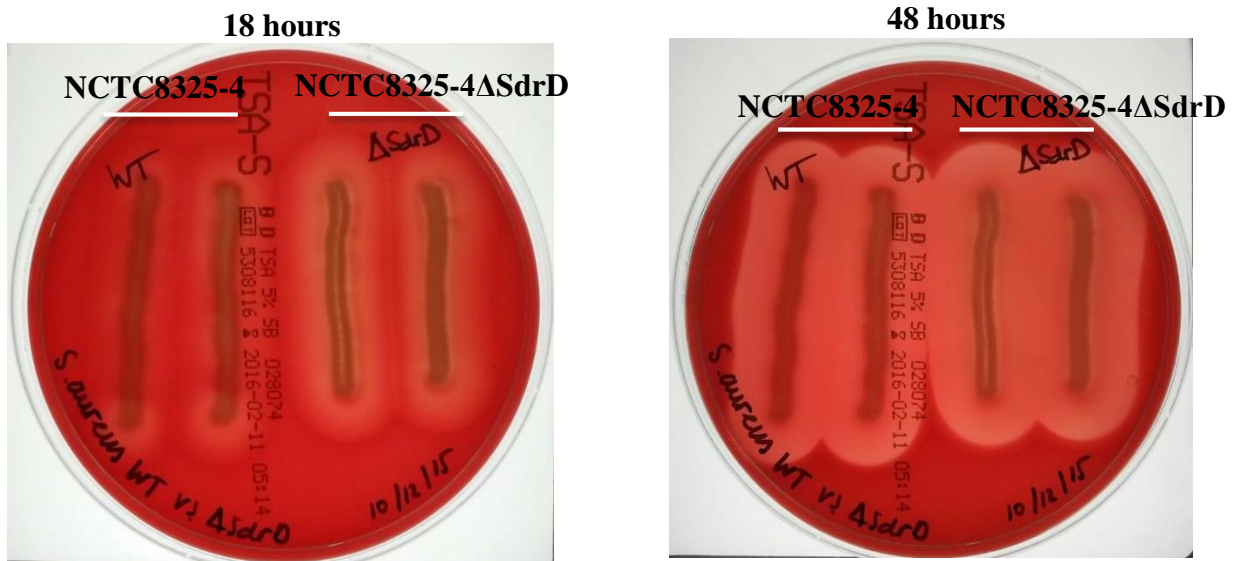

**Supplementary Fig. 1. Growth curves and haemolytic activity of *S. aureus* NCTC8325-4 and NCTC8325-4 $\Delta$ *sdrD*. Comparing (a) growth curves using different media and (b) haemolytic activity of wild type and isogenic mutant after 18 and 48 hours.**

# Supplementary Fig. S2. SdrD expression and purification.

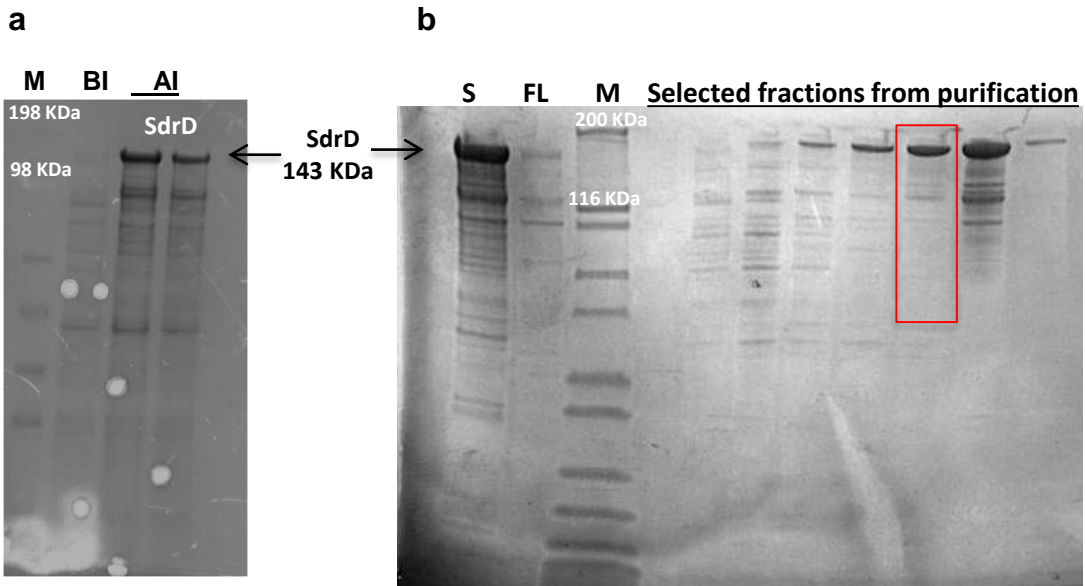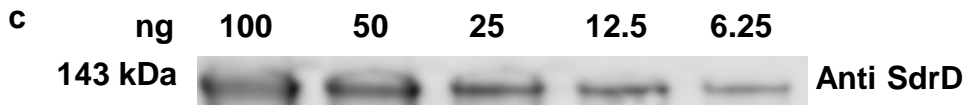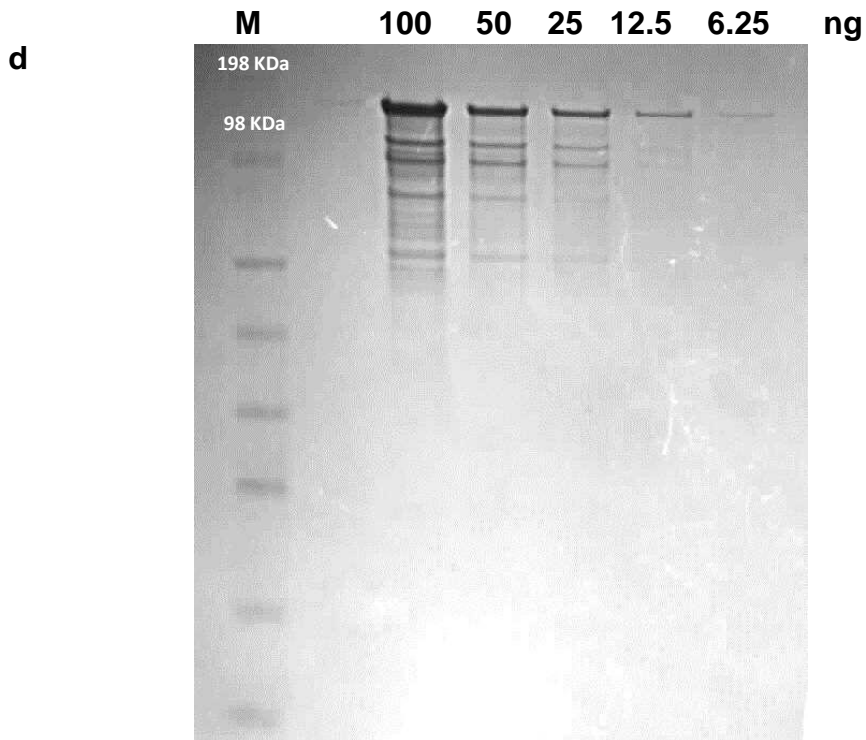

**Supplementary Fig. S2. SdrD expression and purification.** **(a)** The SdrD expression in BL21 cells before and after induction was evaluated using SDS PAGE stained by Coomassie-blue. M (See Blue-marker), BI (before induction), AI (after induction) **(b)** The SdrD was soluble and purified using HisTrap column. S (soluble fraction), FT (flow through) , M (marker, mark 12), selected fractions from the purifications. **(c)** An Immunoblot was performed on purified full-length SdrD using SdrD A-region antibodies. **(d)** Full-length SdrD was evaluated using SDS PAGE stained by Coomassie-blue. M= SeeBlue marker.

**Supplementary Fig. S3 . SdrD promotes *S. aureus* adherence to the host cells expressing Dsg1.**

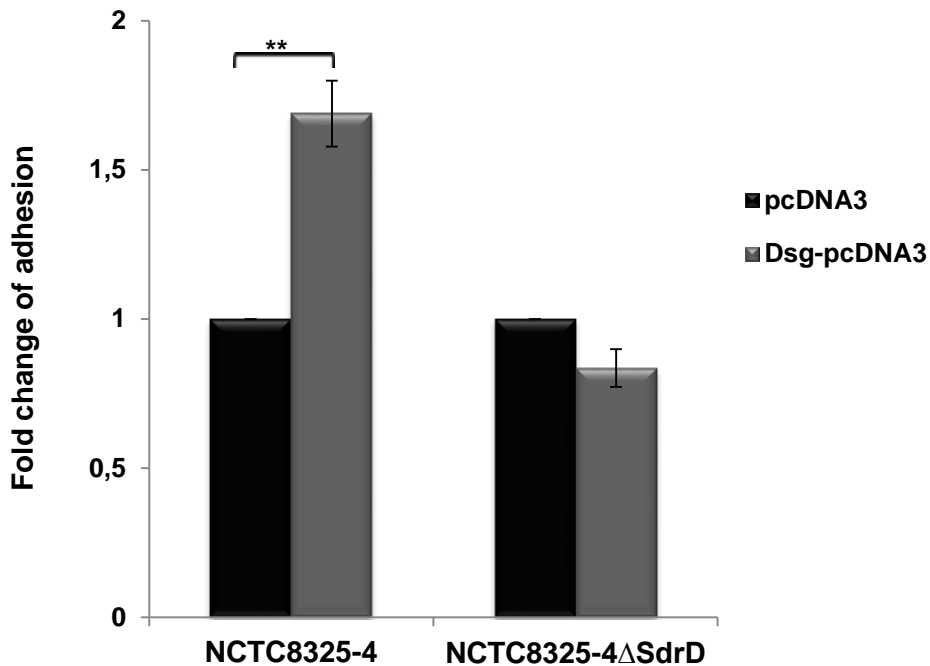

**Supplementary Fig. S3. SdrD promotes adhesion to Dsg1 expressing cells. *S. aureus***

NCTC8325-4 and its isogenic mutant NCTC8325-4Δ*sdrD* were added at MOI 50 to HEK293 cells transfected with pcDNA3-Dsg1 or empty pcDNA3. The cells transfected with empty vector were arbitrarily set as 1, and the adherence in pcDNA3-Dsg1 transfected is represented as fold change. Data represent means ± SEM of triplicates within a single experiments. Statistical analysis was performed by Student's t-test. Significant differences are indicated by ns (no statistical significance) or two (P<0.01) asterisks (\*).
